# Supplementary material for: COVID-19 Vaccination Coverage and Factors Influencing Vaccine Hesitancy among Patients with Inborn Errors of Immunity in Latvia: A Mixed-Methods Study
Source: MDPI journal article supplement (doi:10.3390/vaccines11111637), 2023-10-25
Supplement: s1 [file s1]

## **Supplementation 1. Interview protocol**

### *I Exploring personal beliefs and experiences about vaccination (barriers to vaccination)*

1. Can you tell us about your views on vaccination, both COVID-19 vaccine and in general? (Additional: What prevents you from vaccination/vaccinating your children?)
2. Can you describe a personal experience that has influenced your decision to vaccinate or not to vaccinate/to vaccinate or not to vaccinate your child?
3. Have you been vaccinated/vaccinated your child against COVID-19 and infections other than COVID-19?

### *II Exploring external influences - from other people, religion, society, information sources*

4. To what extent have other people's comments influenced your thoughts about vaccination? (Additional: Can you give an example?)
5. What role do religious beliefs play in your decision-making about vaccination? (Additional: Can you give an example?)
6. Do you feel any societal pressures that may influence your decision to vaccinate or not to vaccinate? (Additional: Can you give an example?)
7. How do you get information about vaccines and what sources do you trust? (Additional question: To what extent do you trust sources of information about vaccines, such as the government, healthcare providers and the media?)

### *III Exploring perceived disease severity, susceptibility, vaccination risks (barriers) and benefits*

8. Speaking specifically about COVID-19, do you think it is a serious disease and are you/your child susceptible towards COVID-19?
9. Can you tell us about any concerns or fears you may have about the safety or effectiveness of vaccines?
10. What do you think are the benefits of vaccination?

### *IV Assessment of the communication of the responsible organisations*

11. How do you feel about the recommendations and policies of government or health organisations on COVID-19 vaccination?
